# Supplementary material for: Evaluating Iowa Severe Maternal Morbidity Trends and Maternal Risk Factors: 2009–2014
Source: Springer Nature journal article supplement (doi:10.1007/s10995-017-2301-4), 2017-07-25
Supplement: MOESM1 [file 13326772]

**SUPPLEMENTAL TABLE 1**

**Comparison of linked and unlinked files birth certificate to hospital discharge**

| Characteristic | BC linked to HDD  n (%)  n = 196,796 | BC not linked to HDD  n (%)  n = 18,837 | *P* value |
| --- | --- | --- | --- |
| Maternal age |  |  | <.0001 |
| < 20 years | 13,133 (6.7%) | 2,101 (11.2%) |  |
| 20-24 years | 45,161 (23.0%) | 6,049 (32.1%) |  |
| 25-34 years | 117,155 (59.5%) | 9,099 (48.3%) |  |
| 35+ years | 21,347 (10.9%) | 1,585 (8.4%) |  |
| Maternal race/ethnicity |  |  | <.0001 |
| Non-Hispanic White | 163,325 (83.0%) | 14,297 (75.9%) |  |
| Non-Hispanic Black | 9,594 (4.9%) | 1,897 (10.1%) |  |
| Non-Hispanic Other | 7,599 (3.9%) | 714 (3.8%) |  |
| Hispanic (All races) | 16,248 (8.3%) | 1,924 (10.2%) |  |
| Maternal residence |  |  | <.0001 |
| Rural | 77,561 (39.4%) | 5,940 (31.5%) |  |
| Urban | 119,235 (60.6%) | 12,897 (68.5%) |  |
| Maternal education |  |  |  |
| ≤ High school education | 61,408 (31.2%) | 6,968 (45.0%) |  |
| More than a high school education | 135,340 (68.8%) | 8,522 (55.0%) |  |
| Marital status |  |  |  |
| Not legally married at conception | 66,724 (33.9%) | 8,074 (52.1%) |  |
| Legally married at conception | 130,071 (66.1%) | 7,421 (47.9%) |  |
| Payer |  |  | <.0001 |
| Medicaid | 77,906 (39.6%) | 9,509 (50.5%) |  |
| Non-Medicaid | 118,890 (60.4%) | 9,328 (49.5%) |  |
| Weight status |  |  |  |
| Obese (BMI ≥ 30.0) | 49,720 (25.3%) | 3,876 (25.1%) | 0.30 |
| Overweight/Normal/Underweight | 146,673 (74.7%) | 11,578 (74.9%) |  |
| GDM | 12,206 (6.2%) | 1,058 (5.6%) | 0.001 |
| Pre-pregnancy HTN | 3,146 (1.6%) | 253 (1.3%) | 0.01 |
| Gestational HTN | 11,755 (6.0%) | 1,166 (6.2%) | 0.23 |
| Maternal smoking in the third trimester | 24,030 (12.2%) | 2,850 (18.4%) | <.0001 |
| Previous delivery |  |  | <.0001 |
| Preterm & C-section | 2,332 (1.2%) | 242 (1.3%) |  |
| Previous C-section | 25,738 (13.1%) | 2,308 (12.3%) |  |
| Previous preterm | 5,236 (2.7%) | 559 (3.0%) |  |
| No preterm/C-section | 87,607 (44.5%) | 7,837 (41.6%) |  |
| Nulliparous | 75,883 (38.6%) | 7,891 (41.9%) |  |
| First trimester PNC | 166,088 (85.6%) | 14,650 (79.6%) | <.0001 |

Abbreviations: BC = Birth Certificate; BMI = Body Mass Index; GDM = Gestational Diabetes Mellitus; HDD = Hospital Discharge Data; HTN = Hypertension; PNC = Prenatal Care

**SUPPLEMENTAL TABLE 2**

**Linkage match rates by year for Iowa birth certificate and hospital discharge data**

| Year | Linkage match rate |
| --- | --- |
| 2009 | 90.4% |
| 2010 | 92.1% |
| 2011 | 92.0% |
| 2012 | 91.4% |
| 2013 | 90.8% |
| 2014 | 100% |

**SUPPLEMENTAL TABLE 3**

**Severe maternal morbidity conditions in Callaghan’s 25-condition definitiona**

| Severe Maternal Morbidity Condition | ICD-9-CM Codesb |
| --- | --- |
| Acute myocardial infarction | 410.xx |
| Acute renal failure | 584.x, 669.3x |
| Adult respiratory distress syndrome | 518.5, 518.81, 518.82, 518.84, 799.1 |
| Amniotic fluid embolism | 673.1x |
| Aneurysm | 441.xx |
| Cardiac arrest/ventricular fibrillation | 427.41, 427.42, 427.5 |
| Disseminated intravascular coagulation | 286.6, 286.9, 666.3x |
| Eclampsia | 642.6x |
| Heart failure during procedure or surgery | 669.4x, 997.1 |
| Internal injuries of thorax, abdomen, and pelvis | 860.xx-869.xx |
| Intracranial injuries | 800.xx, 801.xx, 803.xx, 804.xx, 851.xx-854.xx |
| Puerperal cerebrovascular disorders | 430, 431, 432.xx, 433.xx, 434.xx, 436, 437.x, 671.5x, 674.0x, 997.2, 999.2 |
| Pulmonary edema | 428.1, 518.4 |
| Severe anesthesia complications | 668.0x, 668.1x, 668.2x |
| Sepsis | 038.xx, 995.91, 995.92 |
| Shock | 669.1x, 785.5x, 995.0, 995.4, 998.0 |
| Sickle cell anemia with crisis | 282.62, 282.64, 282.69 |
| Thrombotic embolism | 415.1x, 673.0x, 673.2x, 673.3x, 673.8x |
| Blood transfusion | 99.0x |
| Cardio monitoring | 89.6x |
| Conversion of cardiac rhythm | 99.6x |
| Hysterectomy | 68.3x-68.9 |
| Operations on heart and pericardium | 35.xx, 36.xx, 37.xx, 39.xx |
| Temporary tracheostomy | 31.1 |
| Ventilation | 93.90, 96.01-96.05, 96.7x |

aCallaghan WM, Creanga AA, Kuklina EV. Severe maternal morbidity among delivery and postpartum hospitalizations in the United States. Obstet Gynecol. 2012 Nov;120(5):1029–36.

bICD-9-CM, International Classification of Diseases, Ninth Revision, Clinical Modification
